# Supplementary material for: Unravelling the proteomic signature of extracellular vesicles released by drug-resistant Leishmania infantum parasites
Source: PLOS journal article supplement (doi:10.1371/journal.pntd.0008439), 2020-07-06
Supplement: S6 (10.1371/journal.pntd.0008439.s006) [file journal.pntd.0008439.s006]

**S1 Table. Drug sensitivity profiles of the different strains used in this study.** EC<sub>50</sub> values were calculated from the dose-response curves after performing a nonlinear fitting with the GraphPad 8.0 software program. An average of three independent biological replicates is shown  $\pm$  standard error of the mean.

|                  | <b>Antimony (<math>\mu</math>M)</b> | <b>Miltefosine (<math>\mu</math>M)</b> | <b>Amphotericin B (nM)</b> |
|------------------|-------------------------------------|----------------------------------------|----------------------------|
| <b>WT</b>        | 77.81 $\pm$ 6.80                    | 12.76 $\pm$ 3.40                       | 50.85 $\pm$ 8.24           |
| <b>Sb2000.1</b>  | > 300                               | 9.35 $\pm$ 1.20                        | 60.68 $\pm$ 10.20          |
| <b>MF200.5</b>   | 85.12 $\pm$ 10.25                   | > 200                                  | 48.50 $\pm$ 10.05          |
| <b>AmB1000.1</b> | 80.98 $\pm$ 7.90                    | 30.80 $\pm$ 2.11                       | > 1,000                    |
